# Supplementary material
Source: PubMed Central journal article supplement (PMC3637423)

**Supplemental Figure 2:** Incidence (percent of cohort) for all 4841 phenotypes including ICD9 and V codes. Grey diamonds represent ICD9 codes defined by “rule of 1,” while black squares represent phenotypes defined by “rule of 2.”

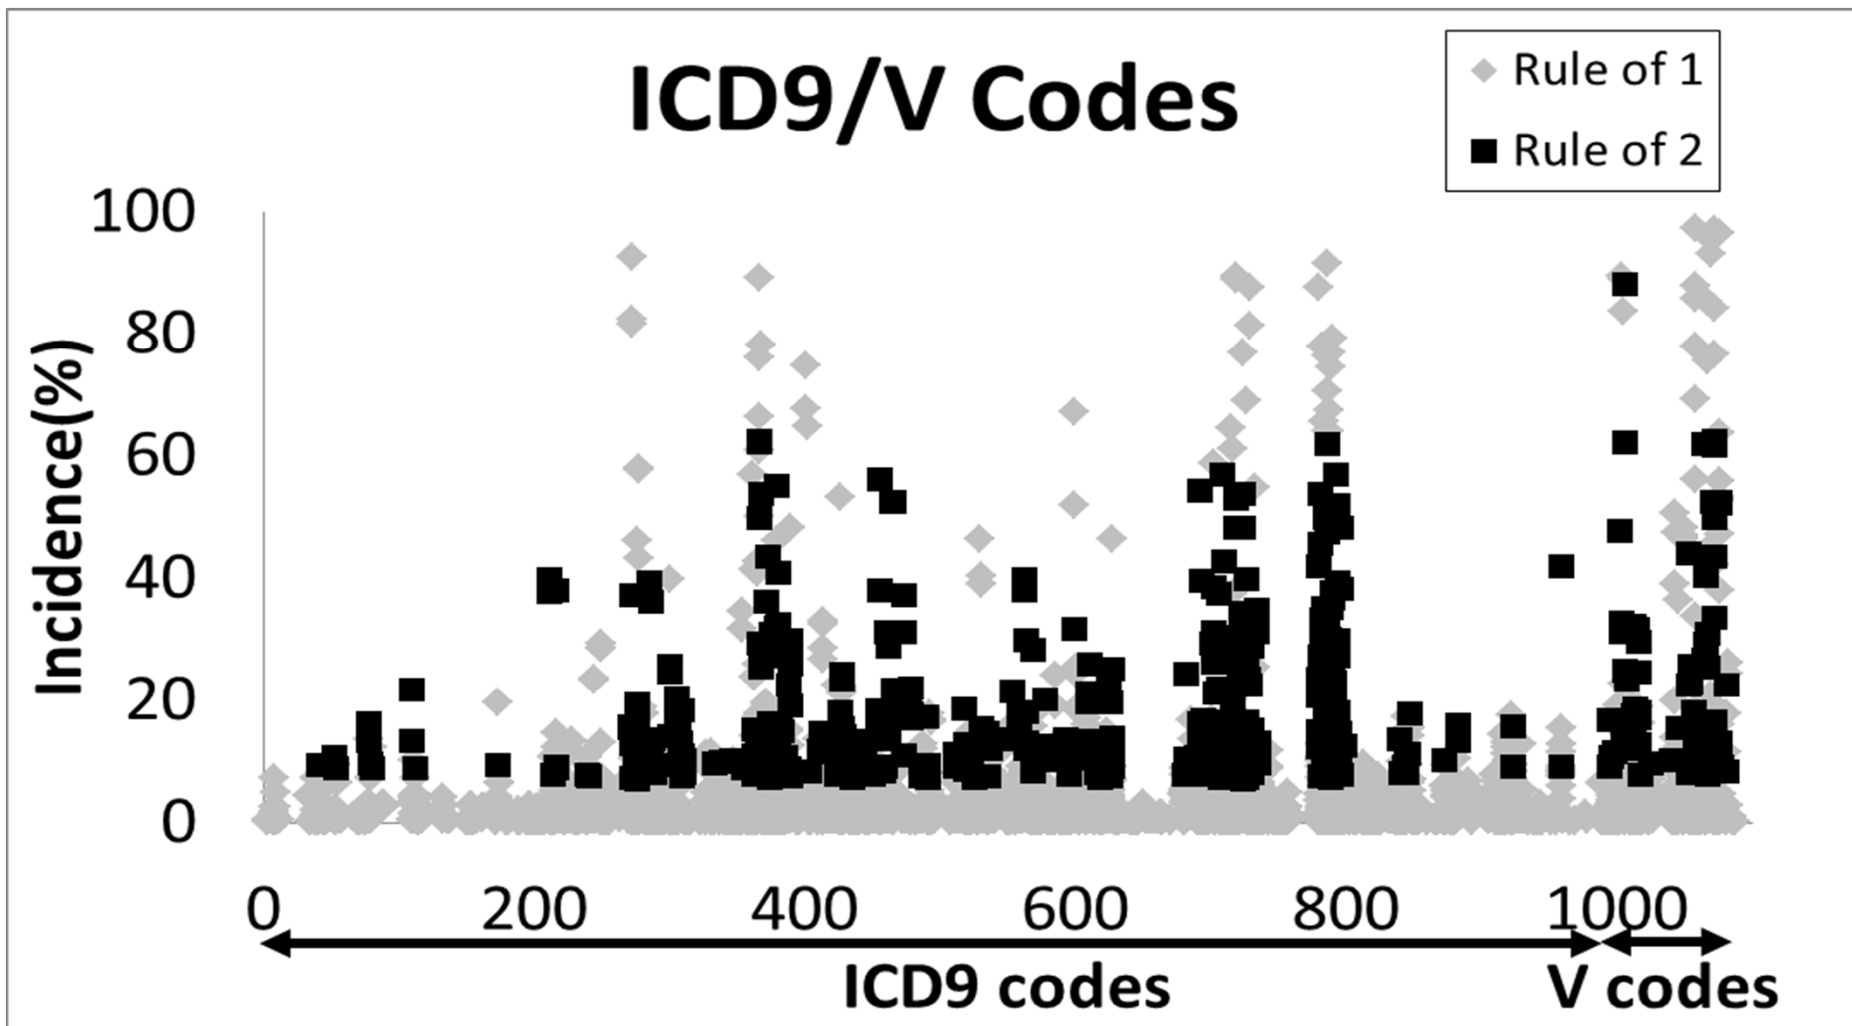

Supplement: NIHMS439236-supplement-SupplFigure2.pdf [file NIHMS439236-supplement-SupplFigure2.pdf]
