# Supplementary material
Source: PubMed Central journal article supplement (PMC3637423)

### Supplemental Figure 3:

Q-Q plot of rs3135388 PheWAS under the additive model. Observed p-values are unadjusted

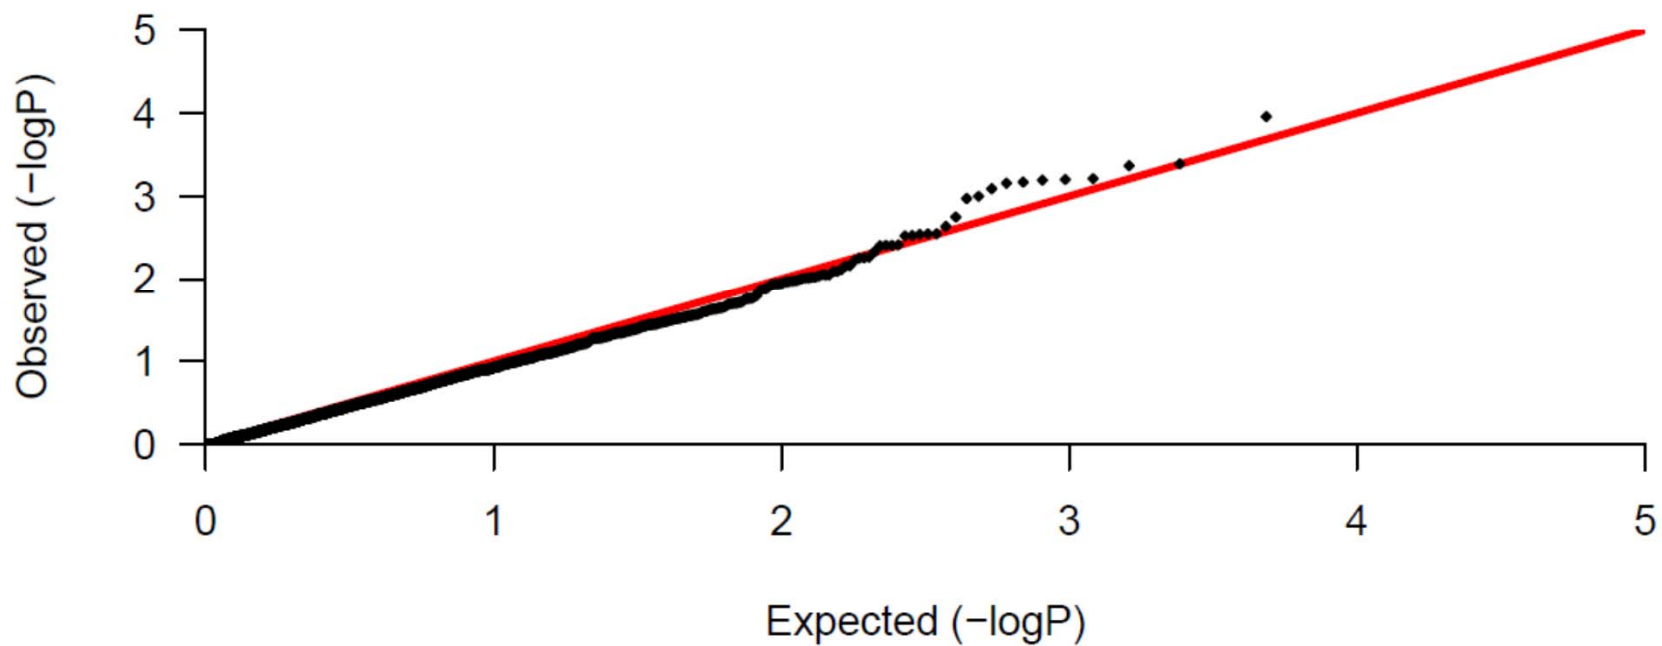

Supplement: NIHMS439236-supplement-SupplFigure3.pdf [file NIHMS439236-supplement-SupplFigure3.pdf]
