# Supplementary material
Source: PubMed Central journal article supplement (PMC3637423)

**Supplemental Figure 1:**  
Breakdown of ICD9 695 by 695.3,  
695.89, and other 965.\*  
phenotypes

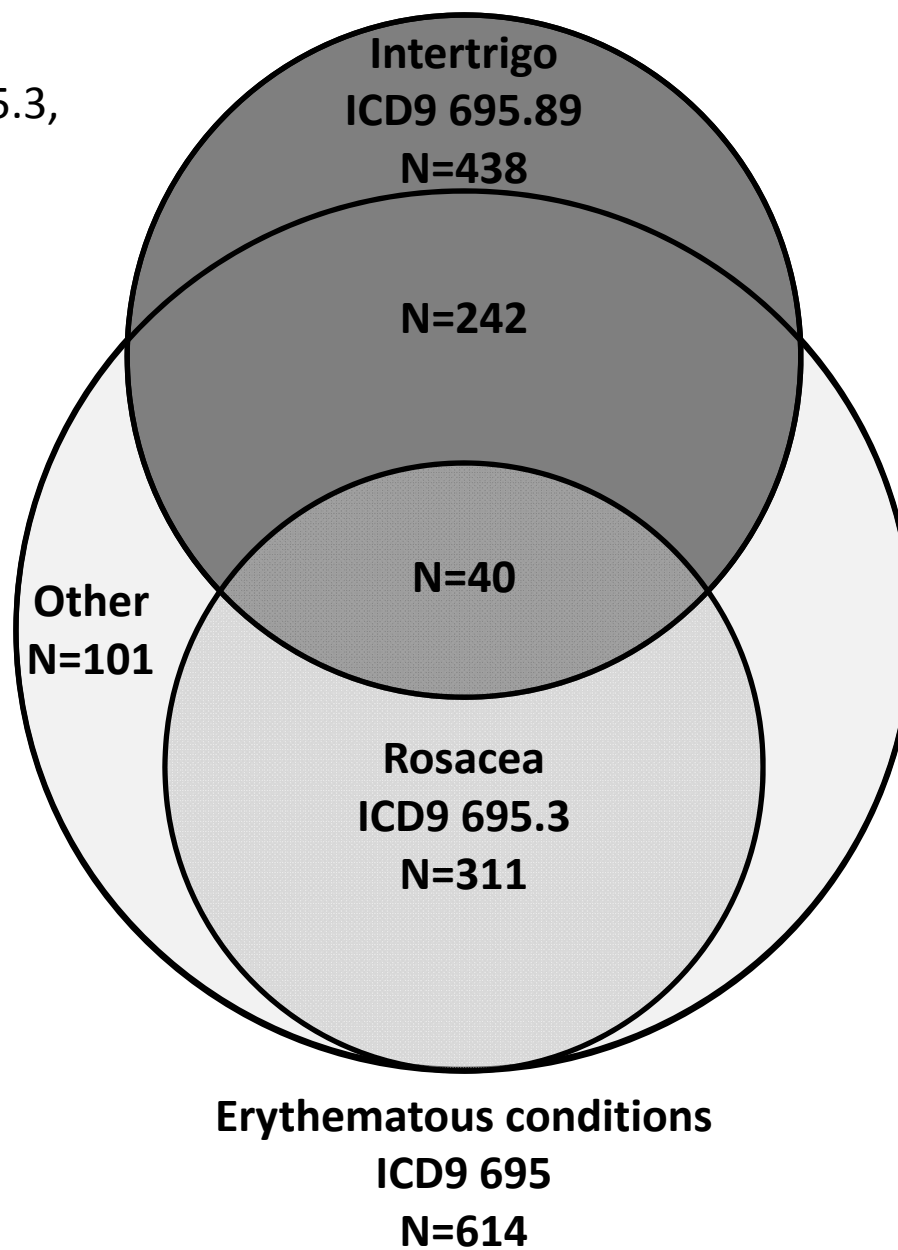

Supplement: NIHMS439236-supplement-SupplFigure1.pdf [file NIHMS439236-supplement-SupplFigure1.pdf]
